# Supplementary material
Source: publisher figshare collection journal article supplement (https://tandf.figshare.com/ndownloader/files/12383885)
Supplement: Supplementary file 1 [file 12383885]

**Resolution of racemic Vigabatrin using tartaric acid**

Kishore Karumanchi,* Senthil Kumar Natarajan,Krishna Murthy V R Moturu,Ramadas Chavakula, Raghu Babu Korupoluand Kishore Babu Bonige

| **S.No** | **Content** | **Page. No** |
| --- | --- | --- |
| 1 | (*S*)-Vigabatrin (1H NMR,13C NMR, HRMS, SOR, IR) | 2-7 |
| 2 | (*R*)-Vigabatrin (1H NMR, SOR, IR) | 8-11 |
| 3 | Vigabatrin-L-tartarate(1H NMR, SOR, IR) | 12-15 |
| 4 | Vigabatrin-D-tartarate(1H NMR, SOR, IR) | 16-19 |


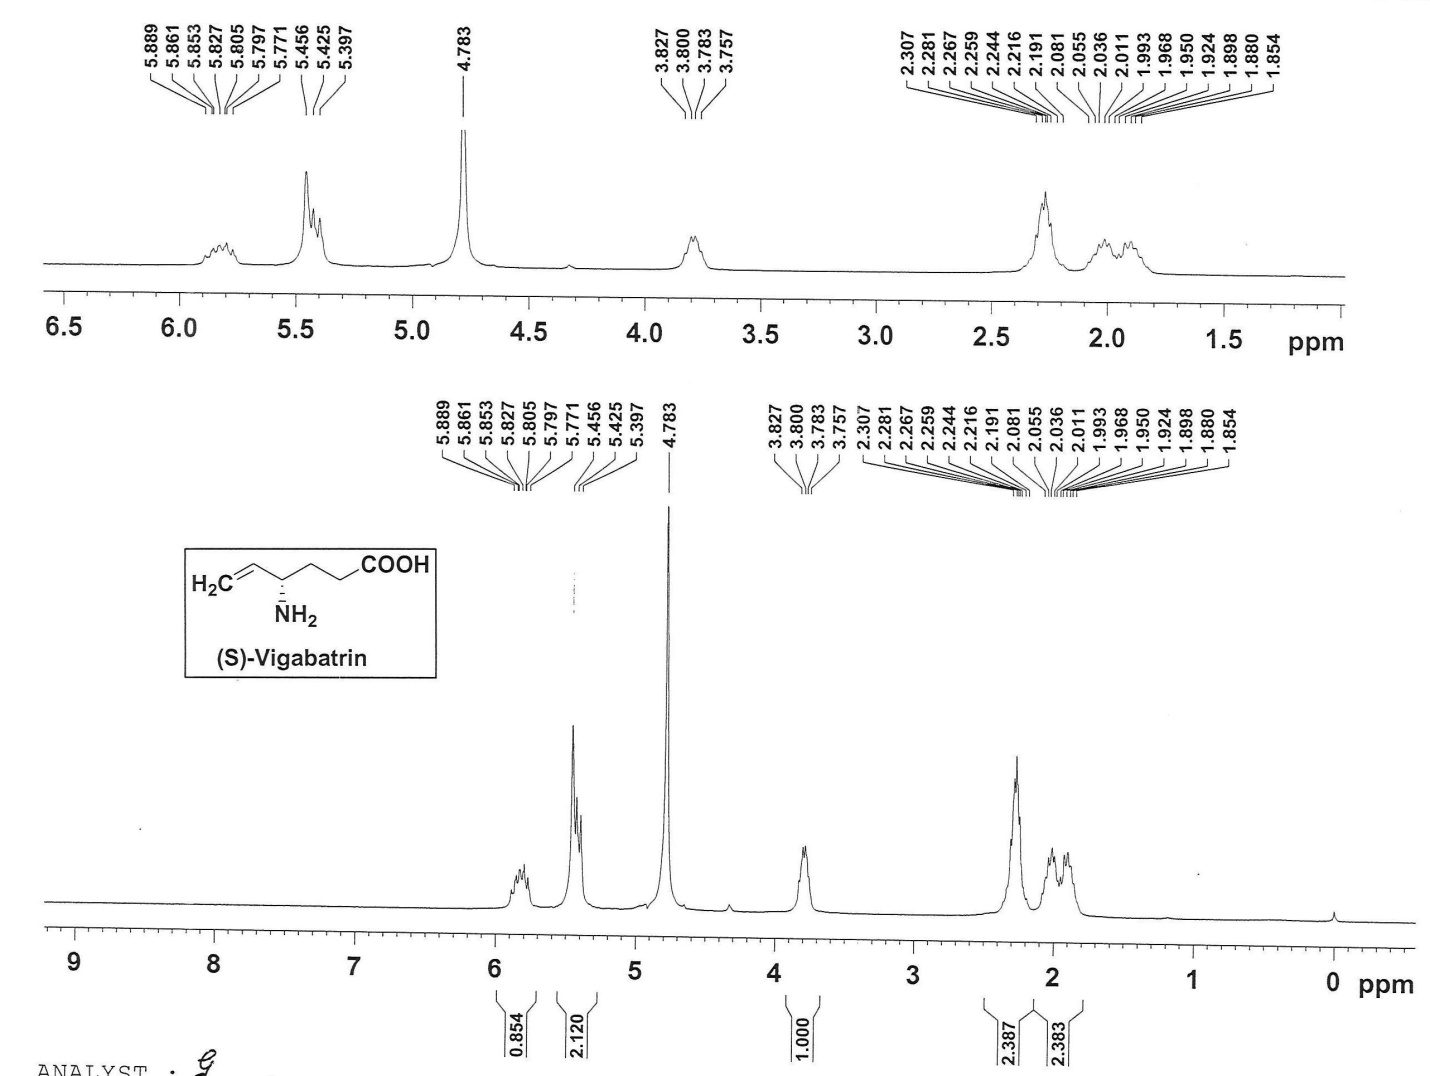


1H NMR spectrum of compound **2**


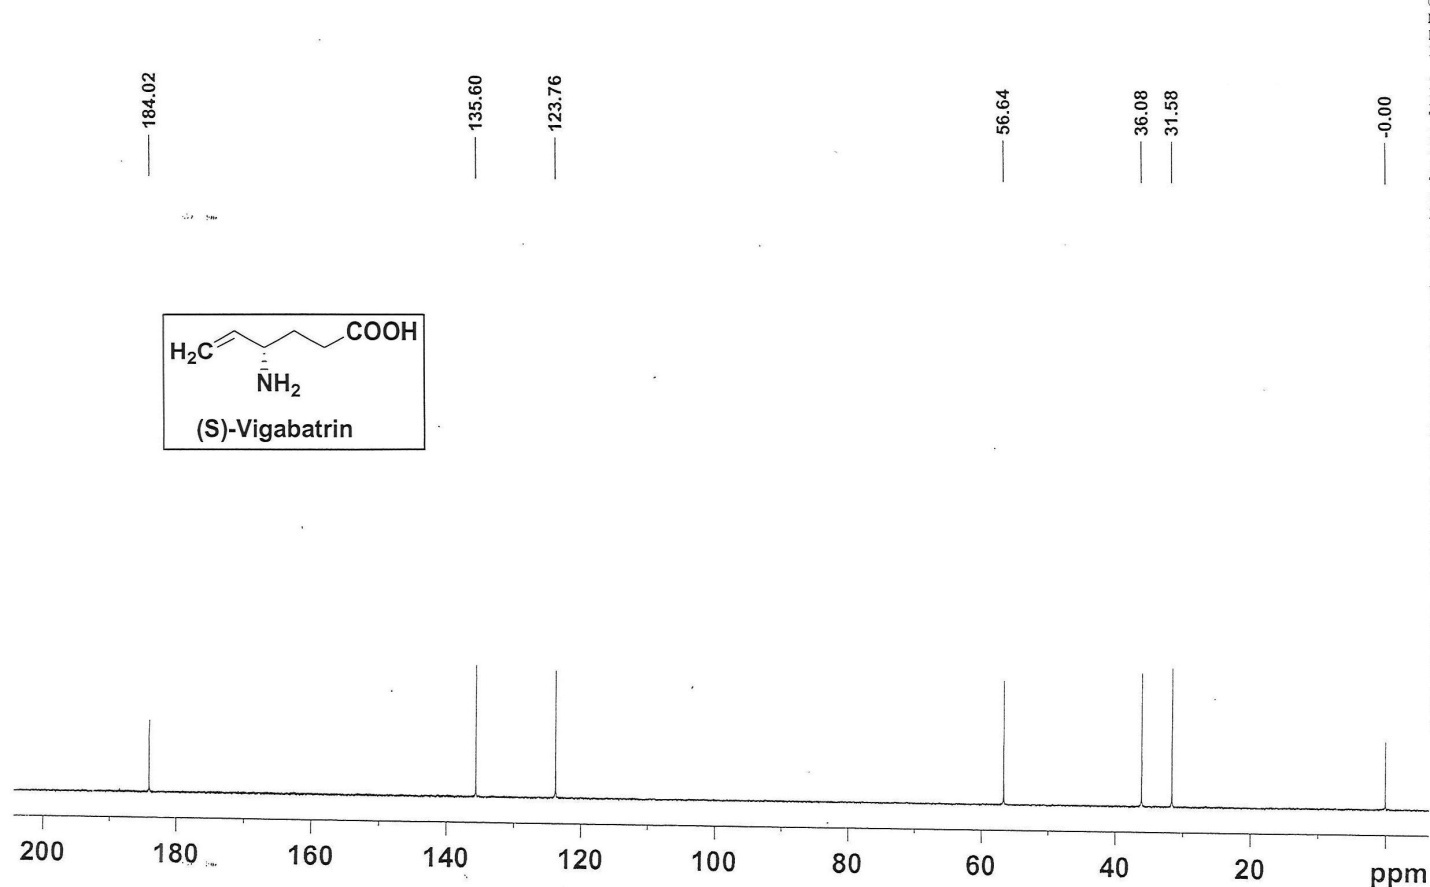


13C NMR spectrum of compound **2**


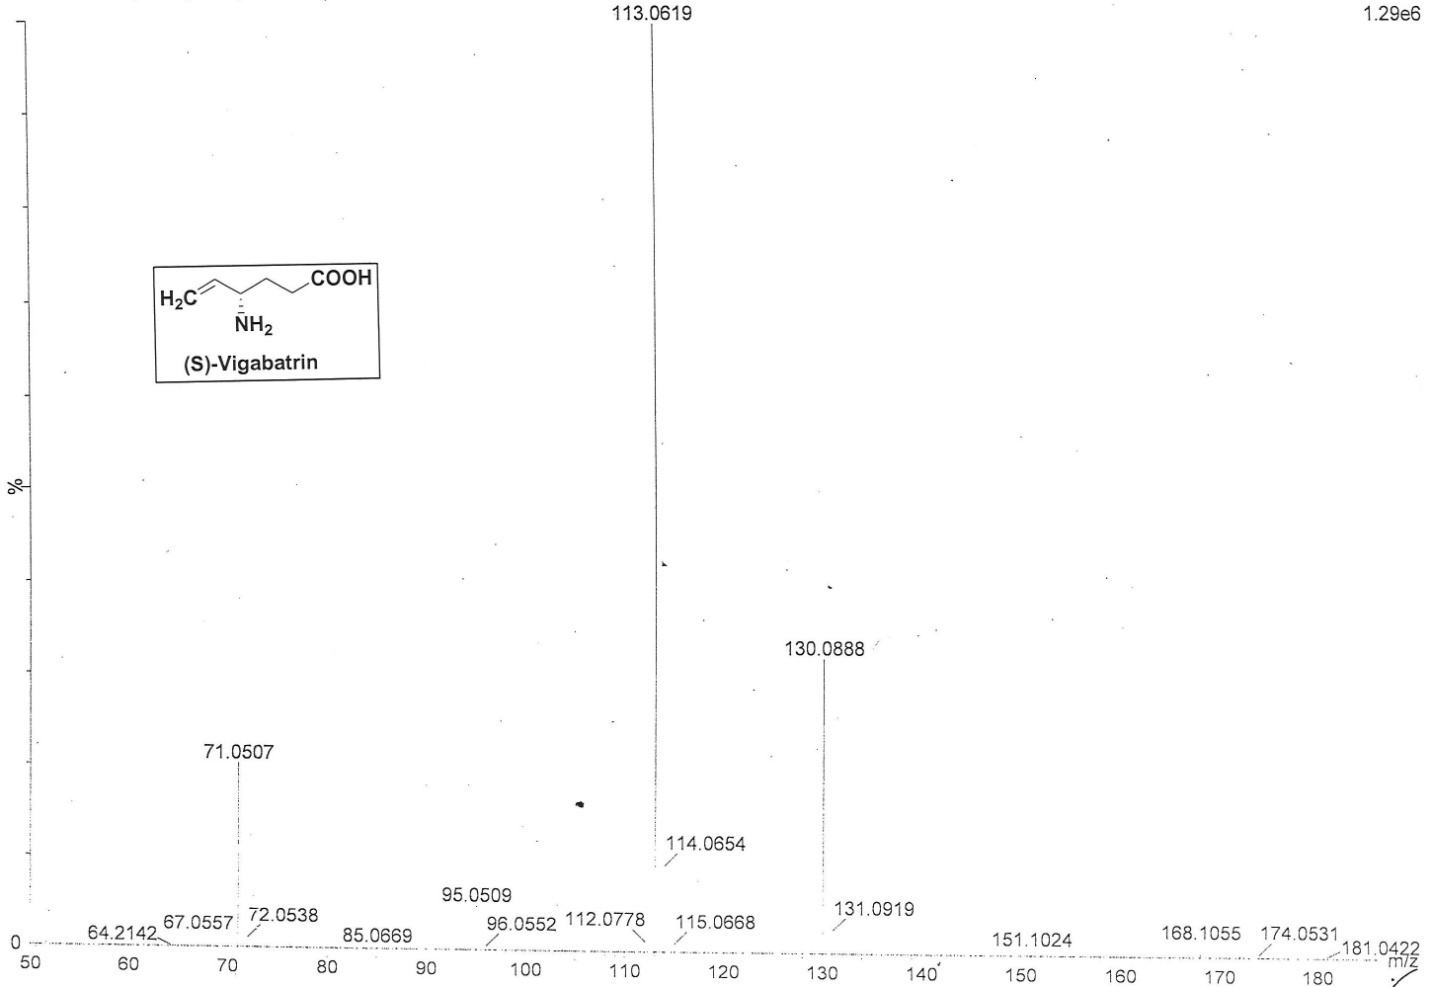


HRMS of compound **2**


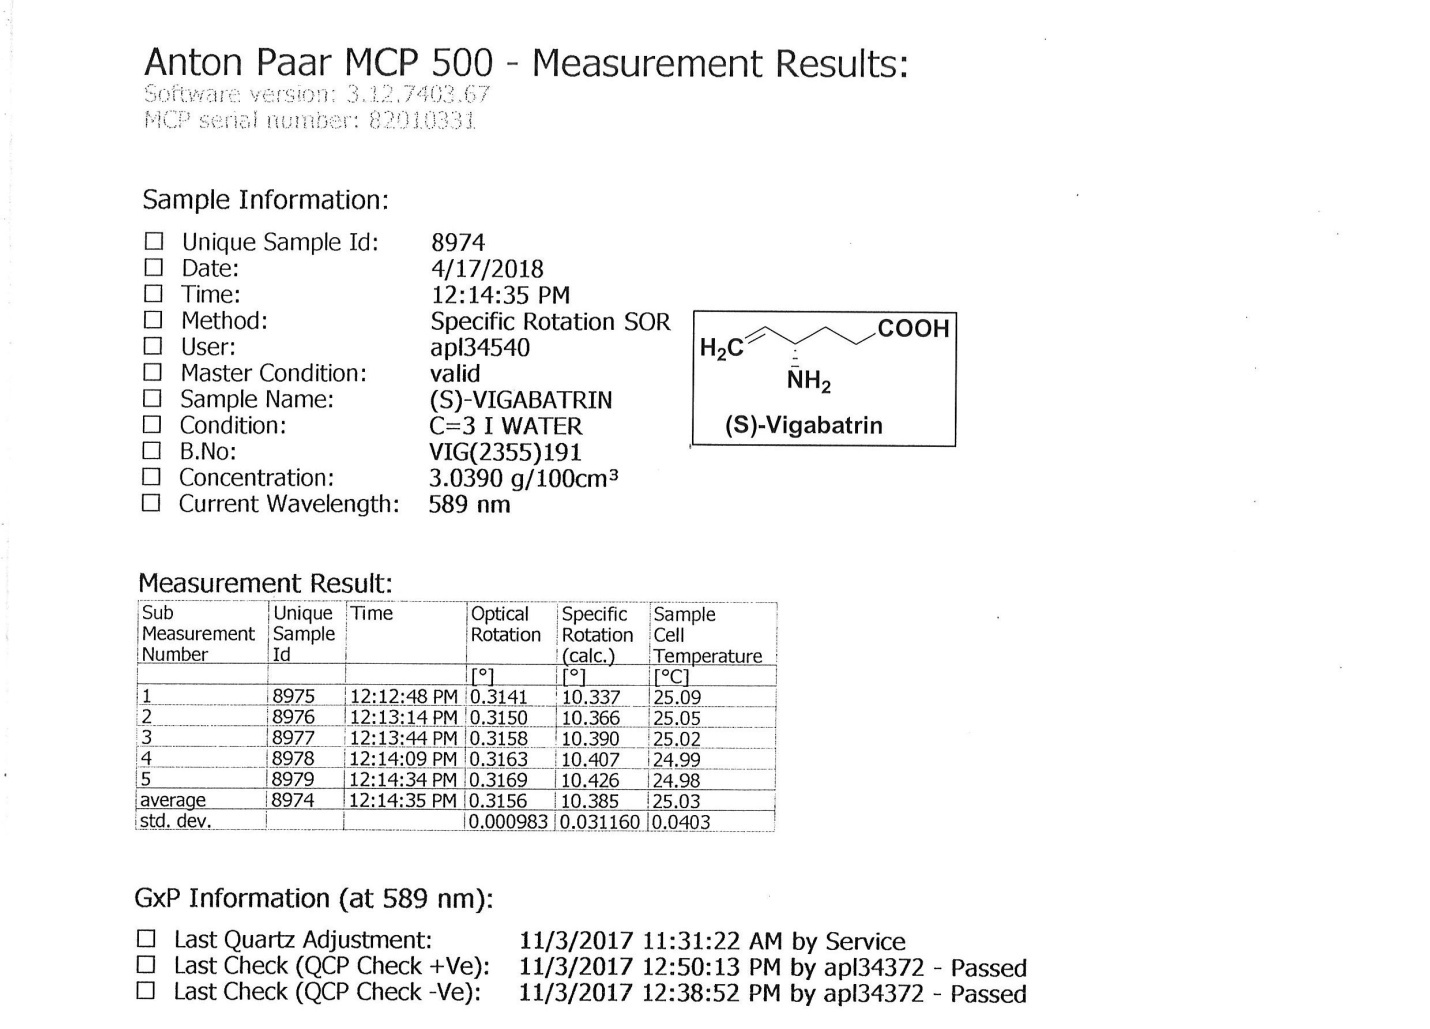


Specific Optical Rotation (SOR) of compound **2**


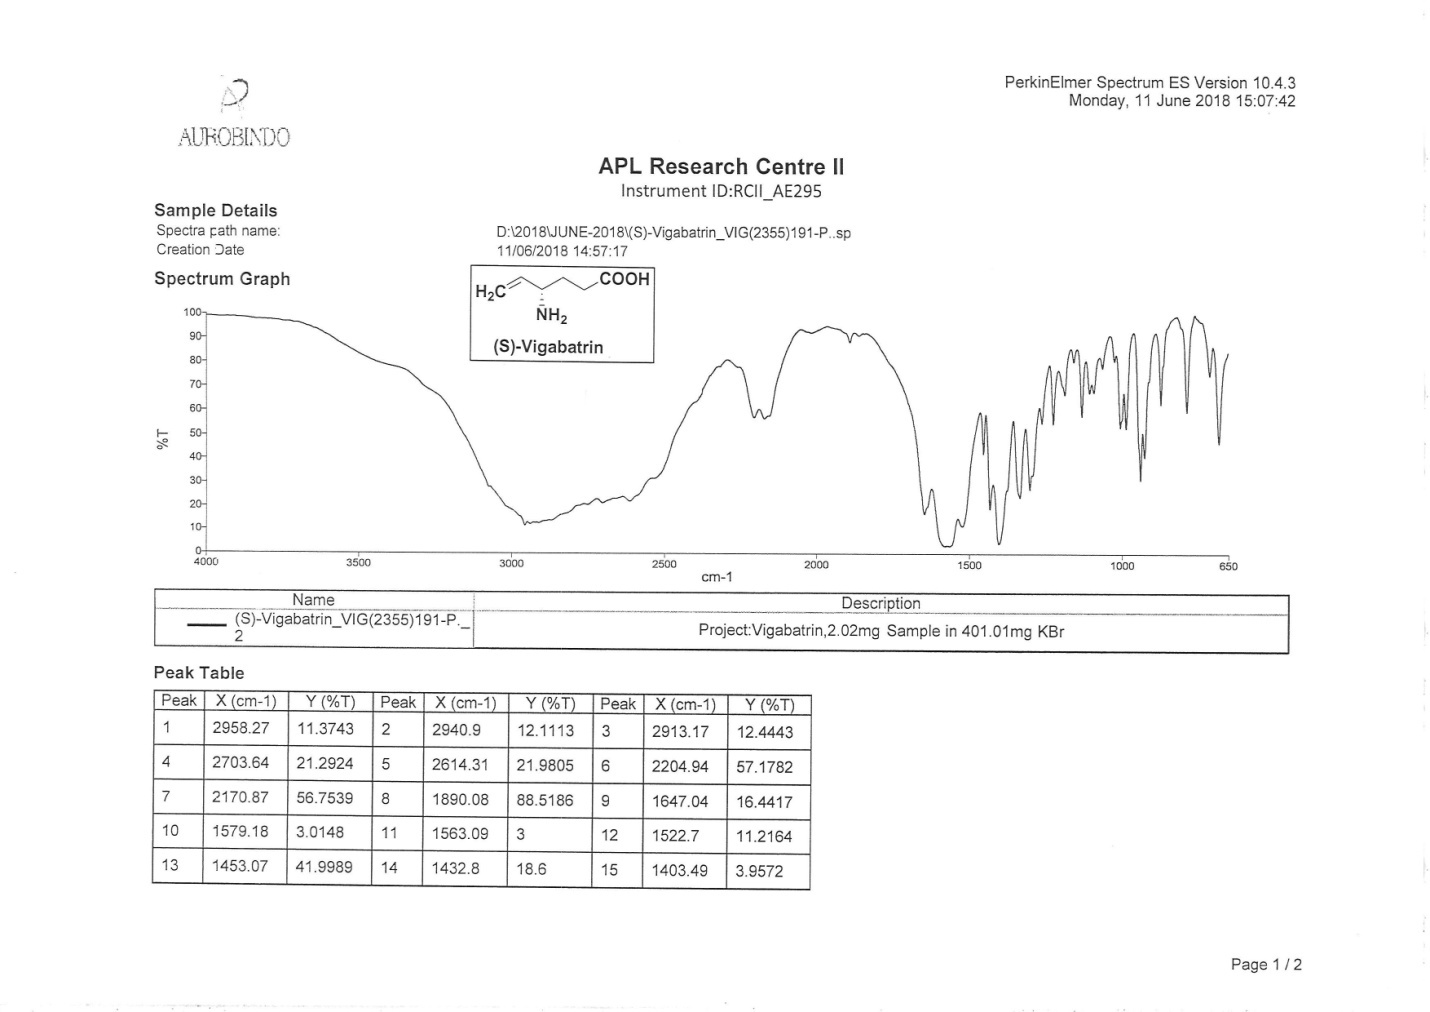


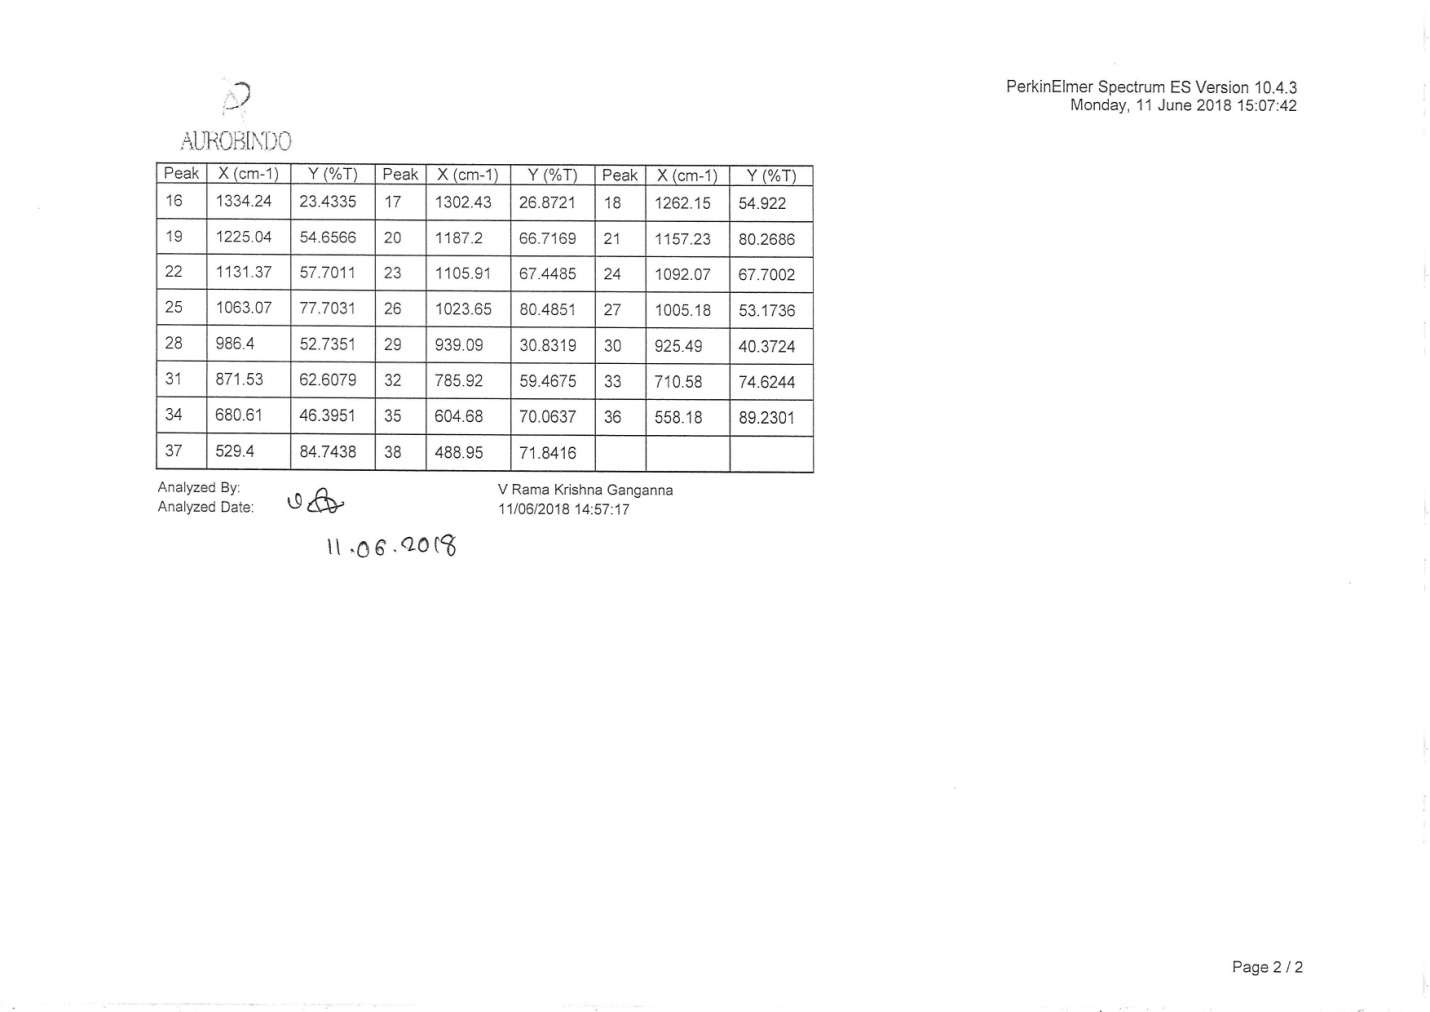


IR spectrum of compound **2**


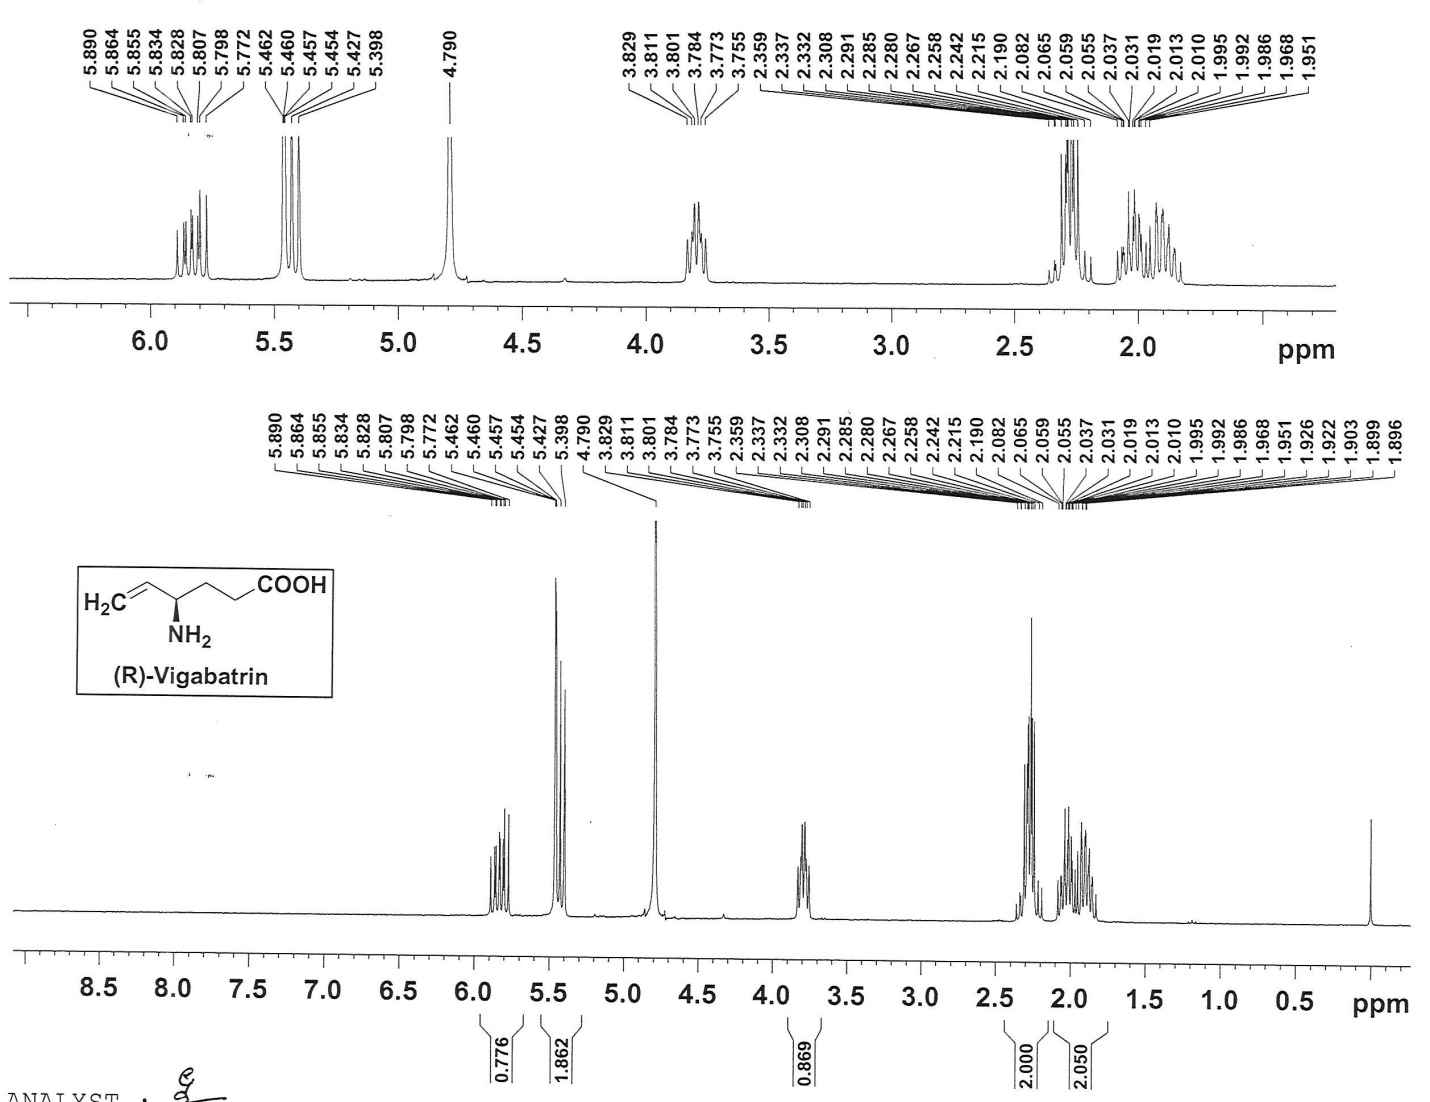


1H NMR spectrum of compound **3**


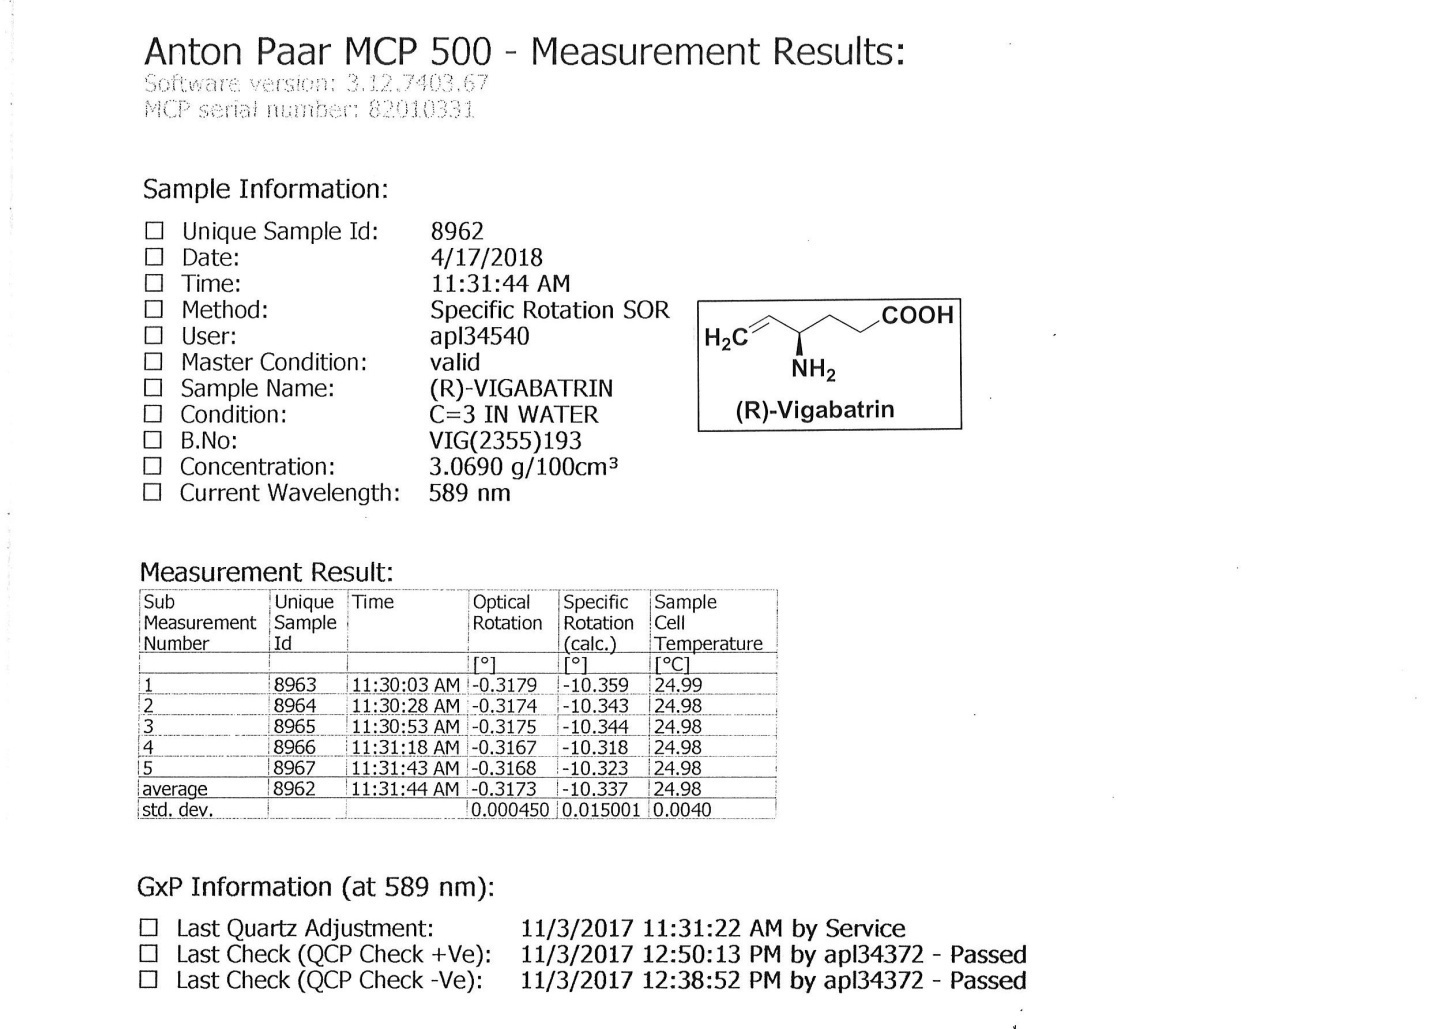


Specific Optical Rotation (SOR) of compound **3**


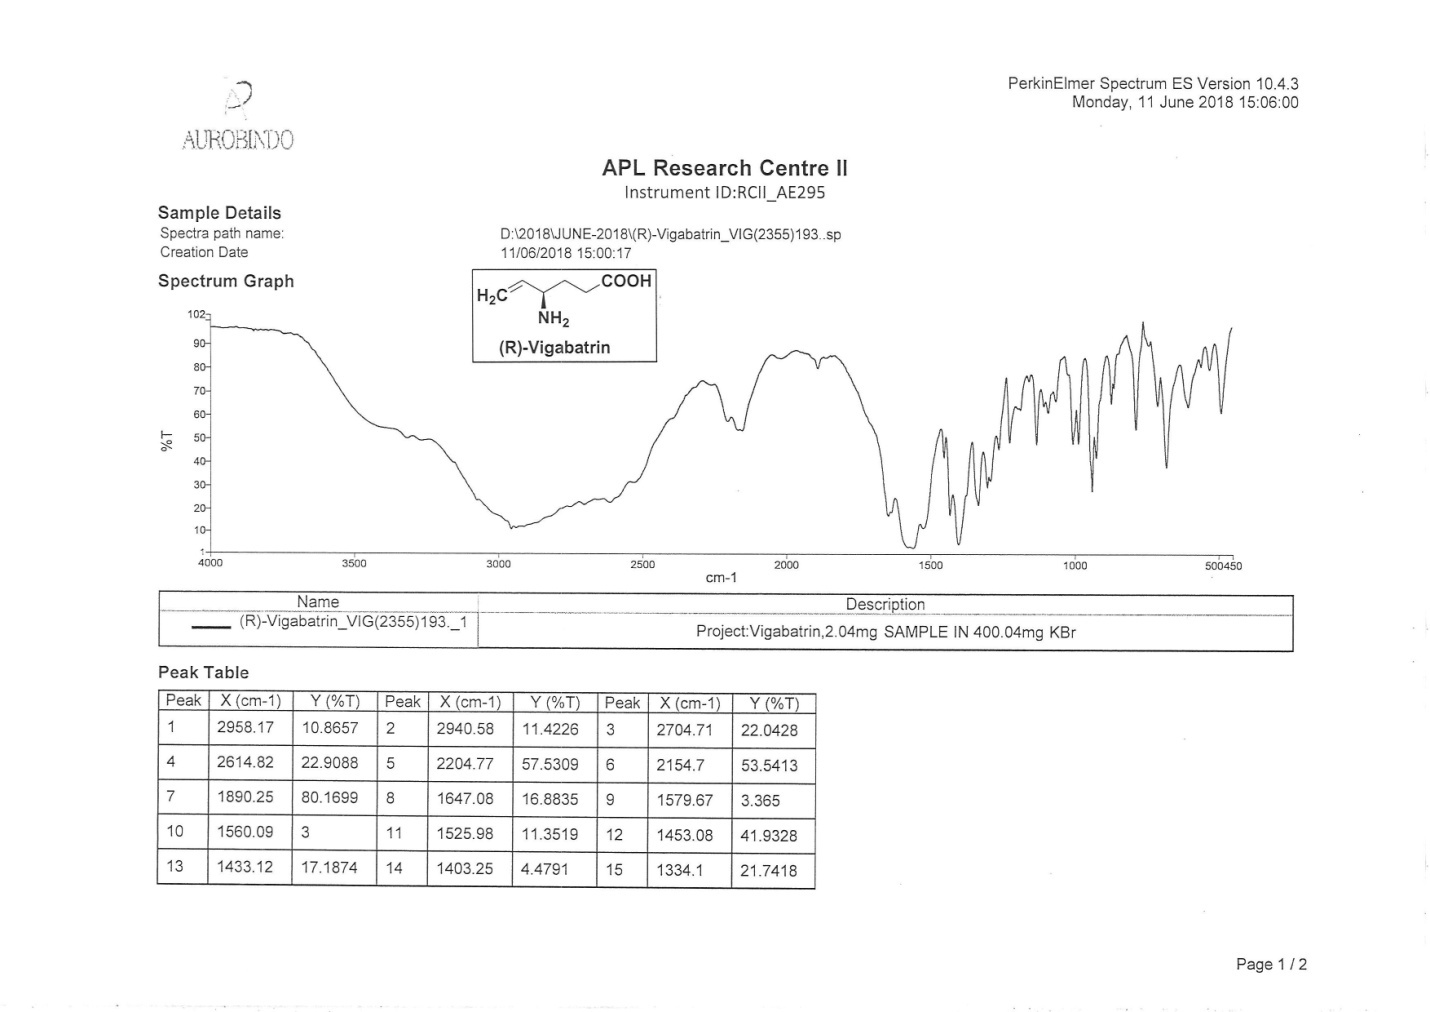


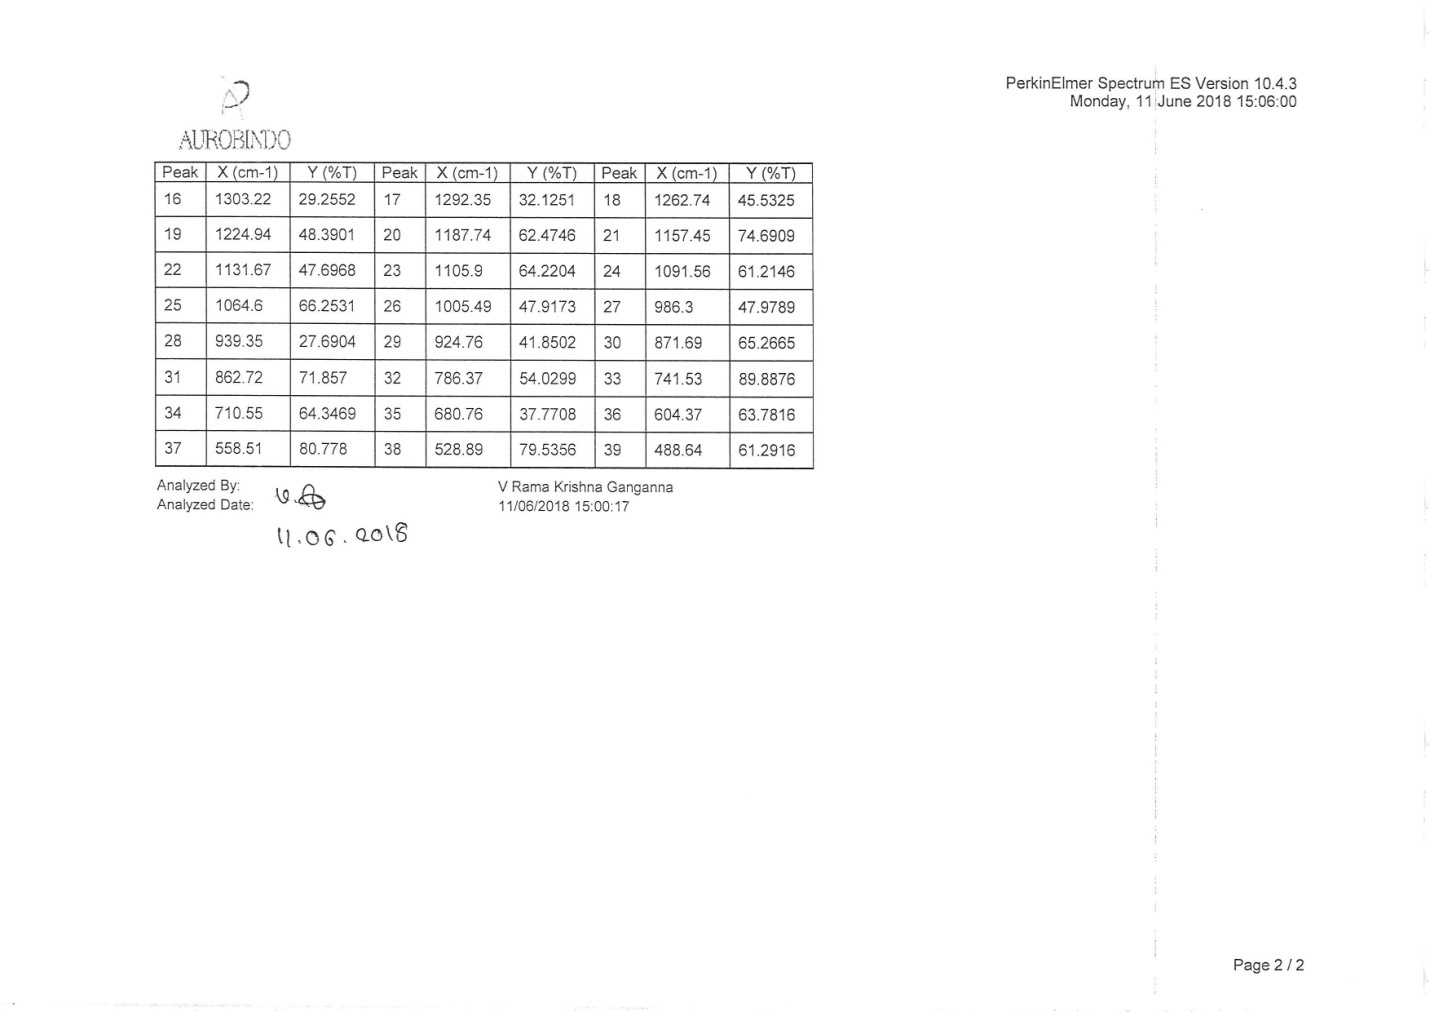


IR spectrum of compound **3**


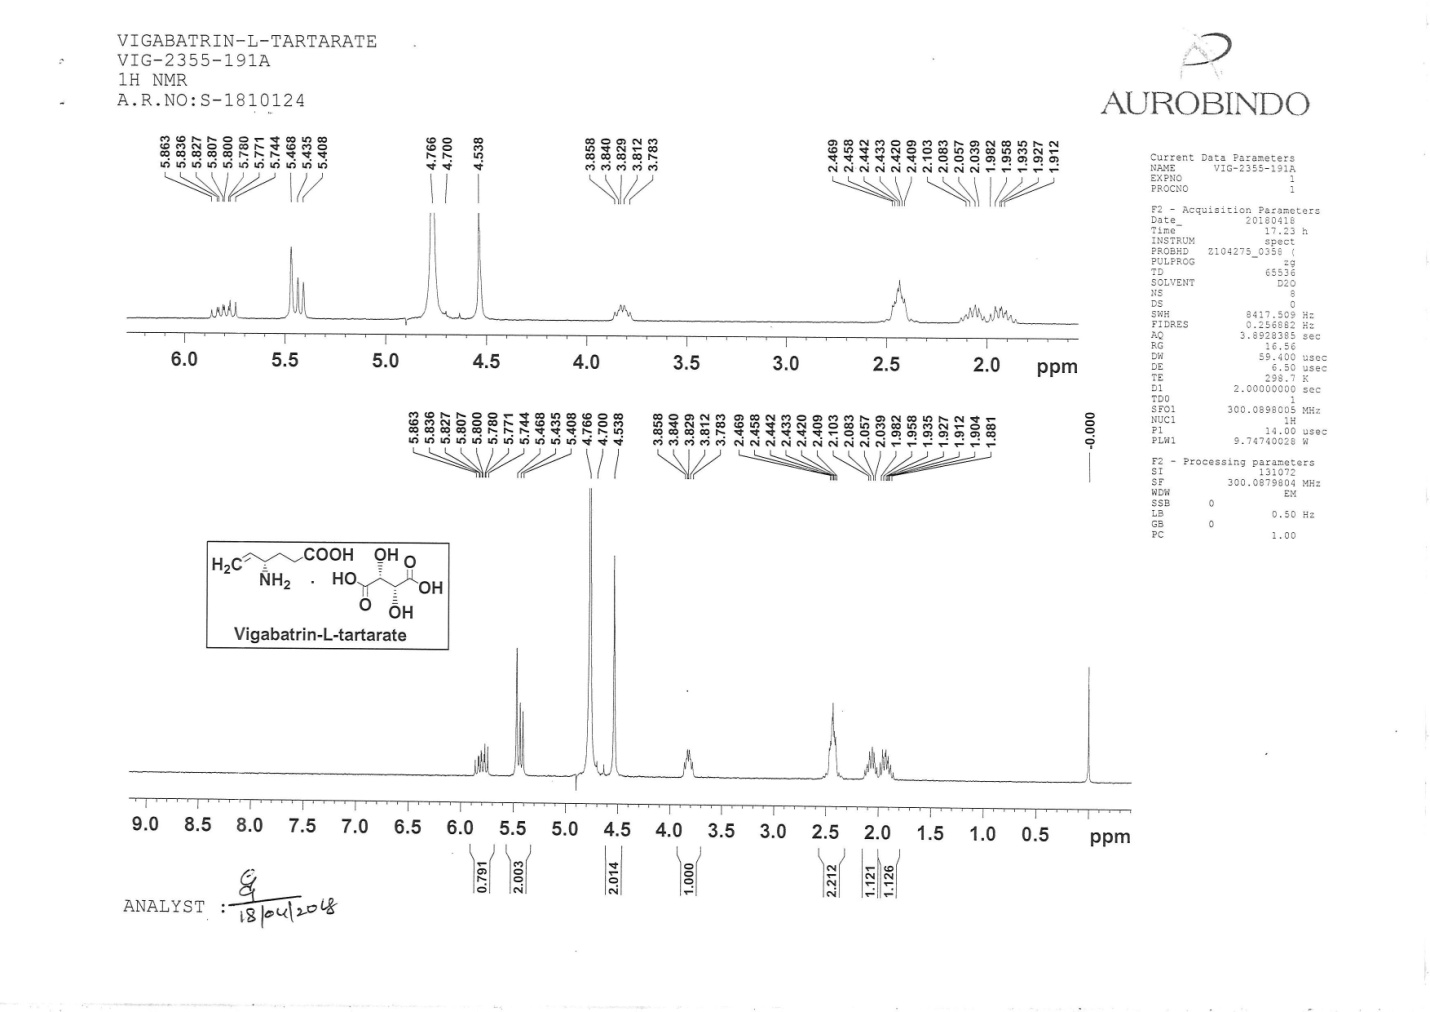


1H NMR spectrum of compound **5**

**
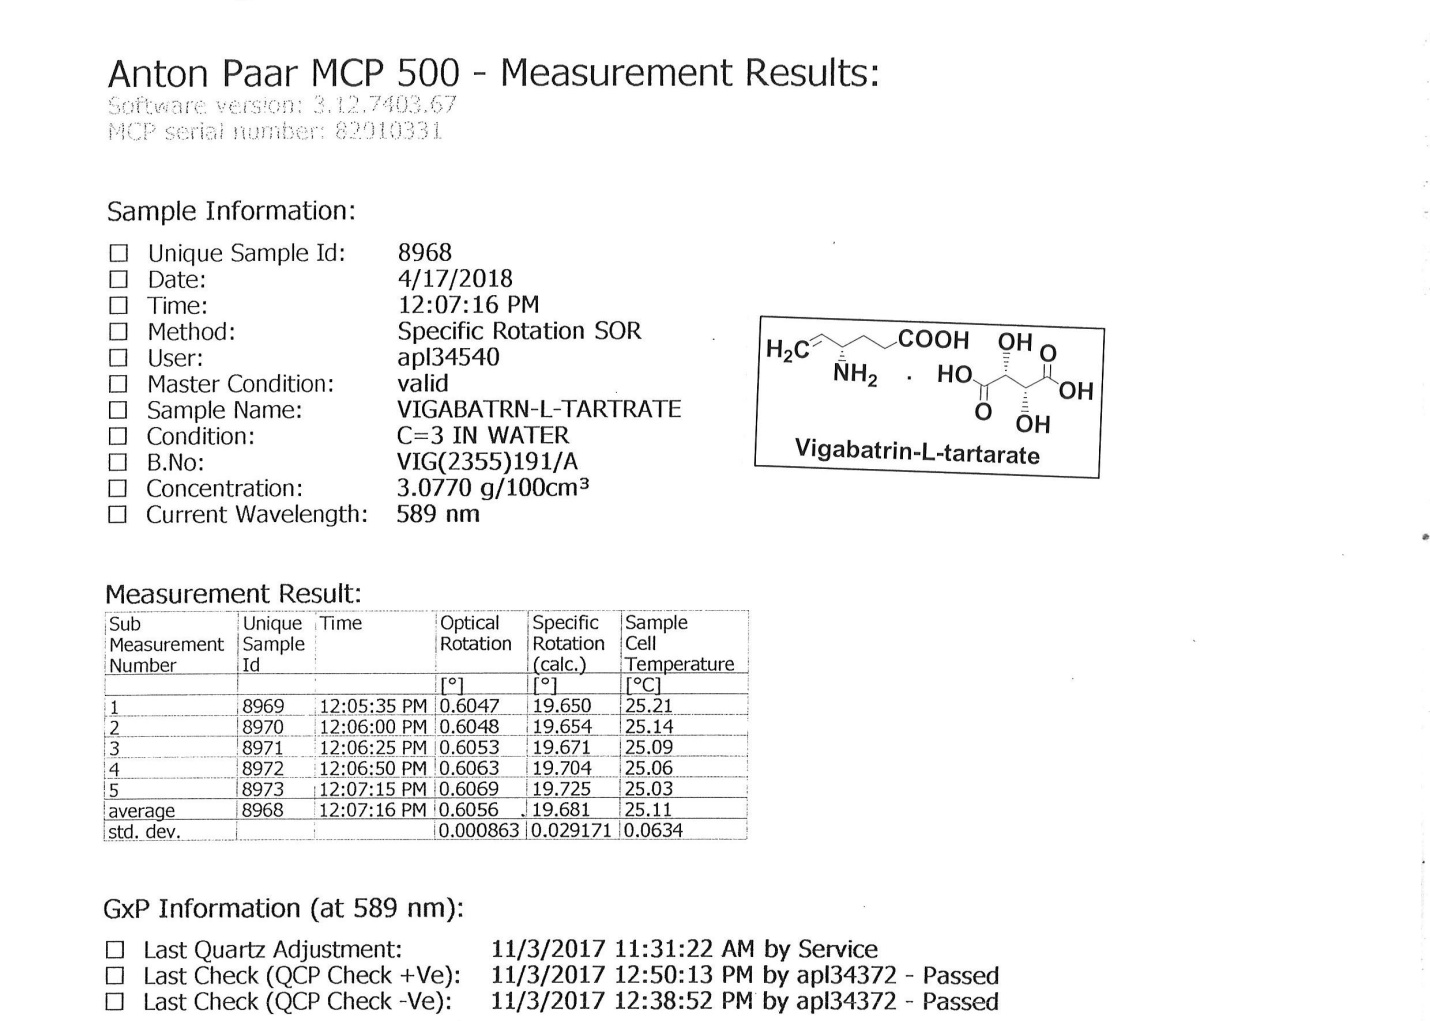
**

Specific Optical Rotation (SOR) of compound **5**

**
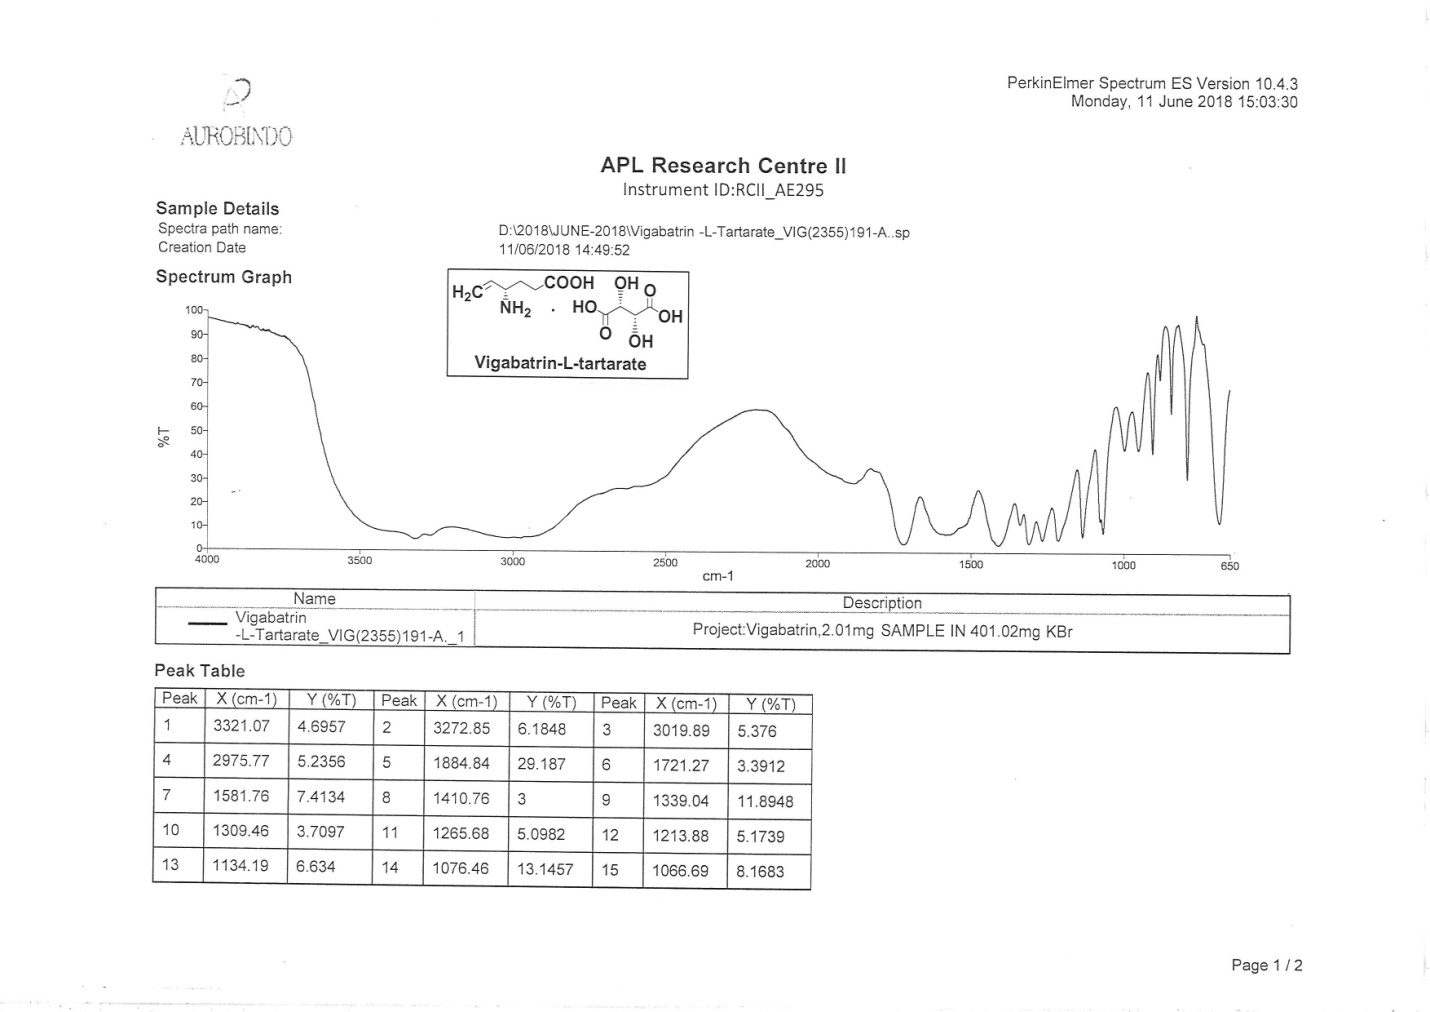
**


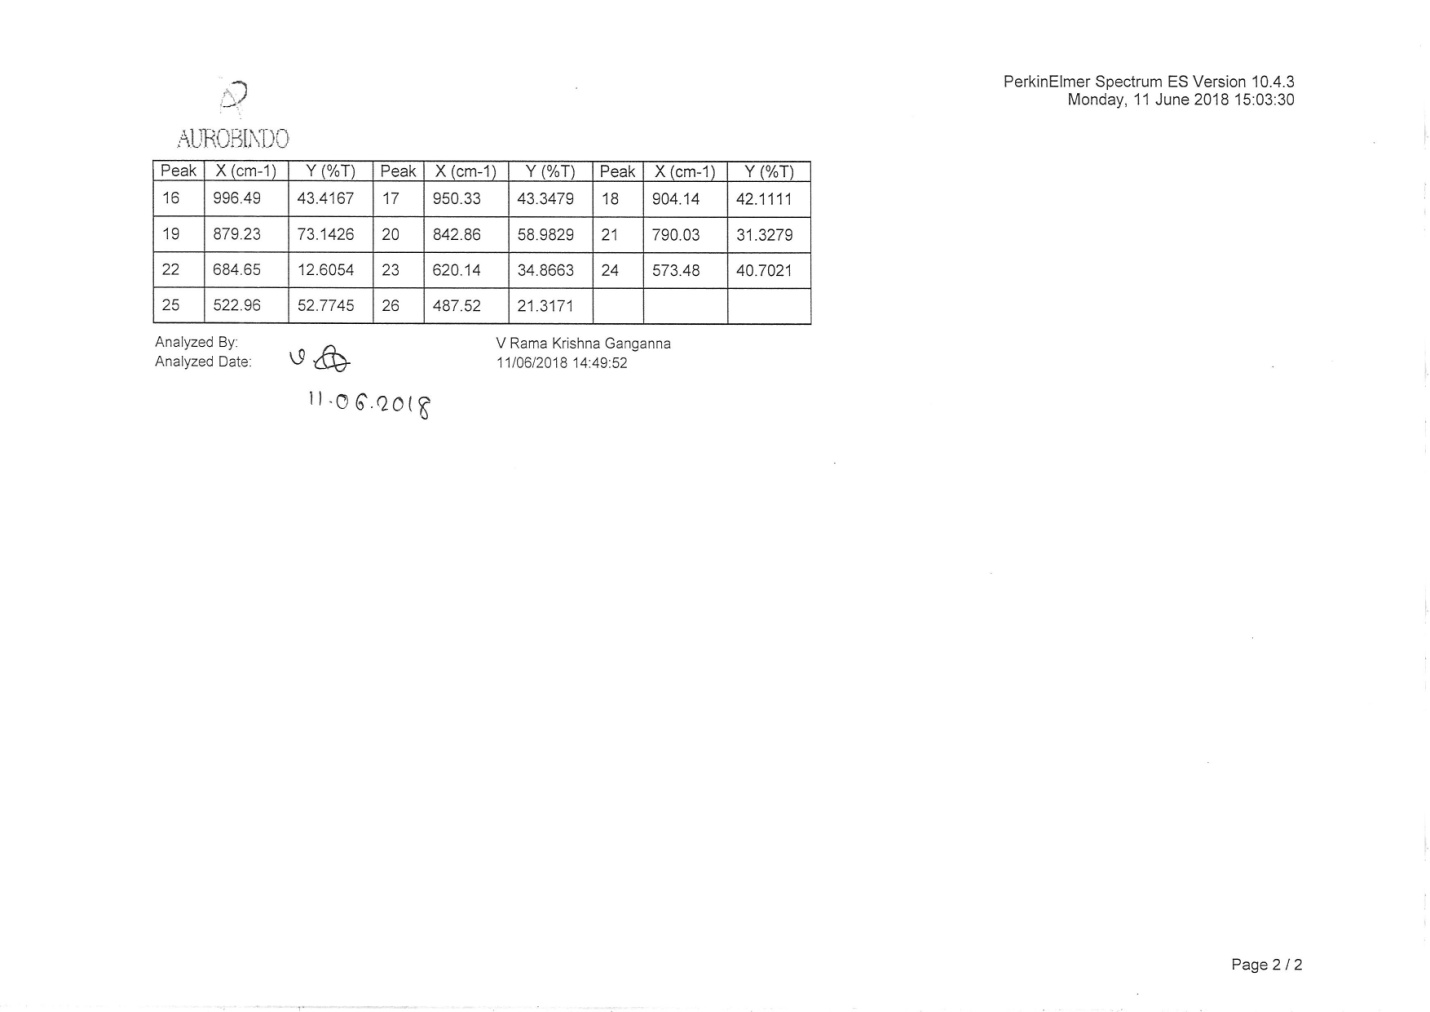


IR spectrum of compound **5**


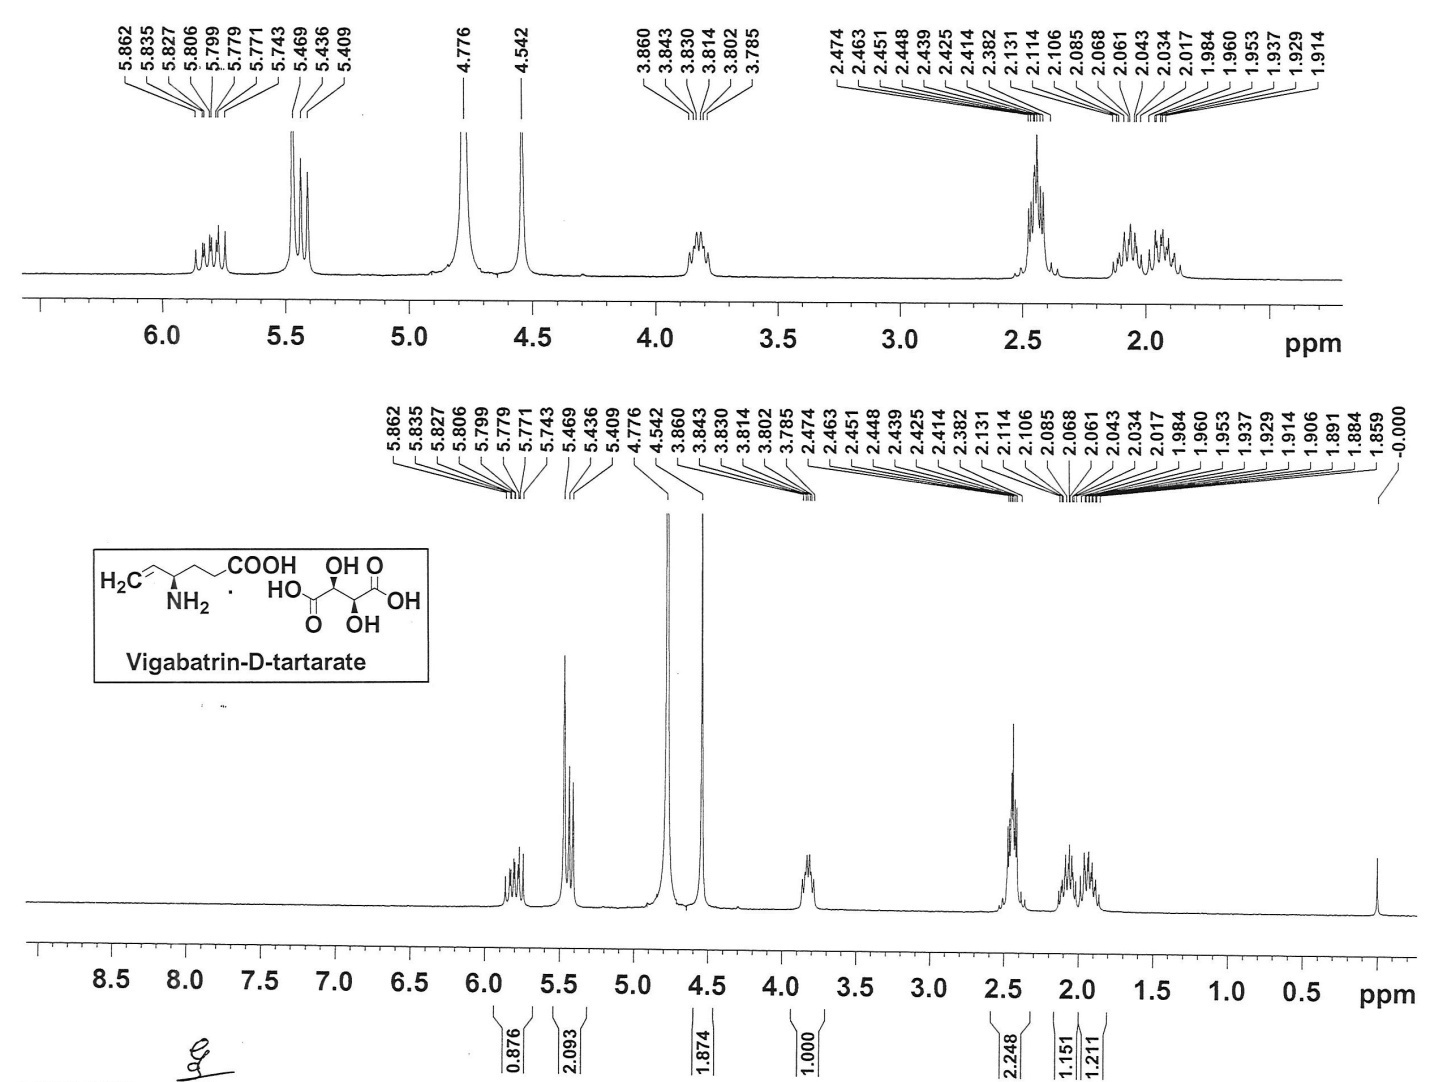


1HNMR spectrum of compound **7**


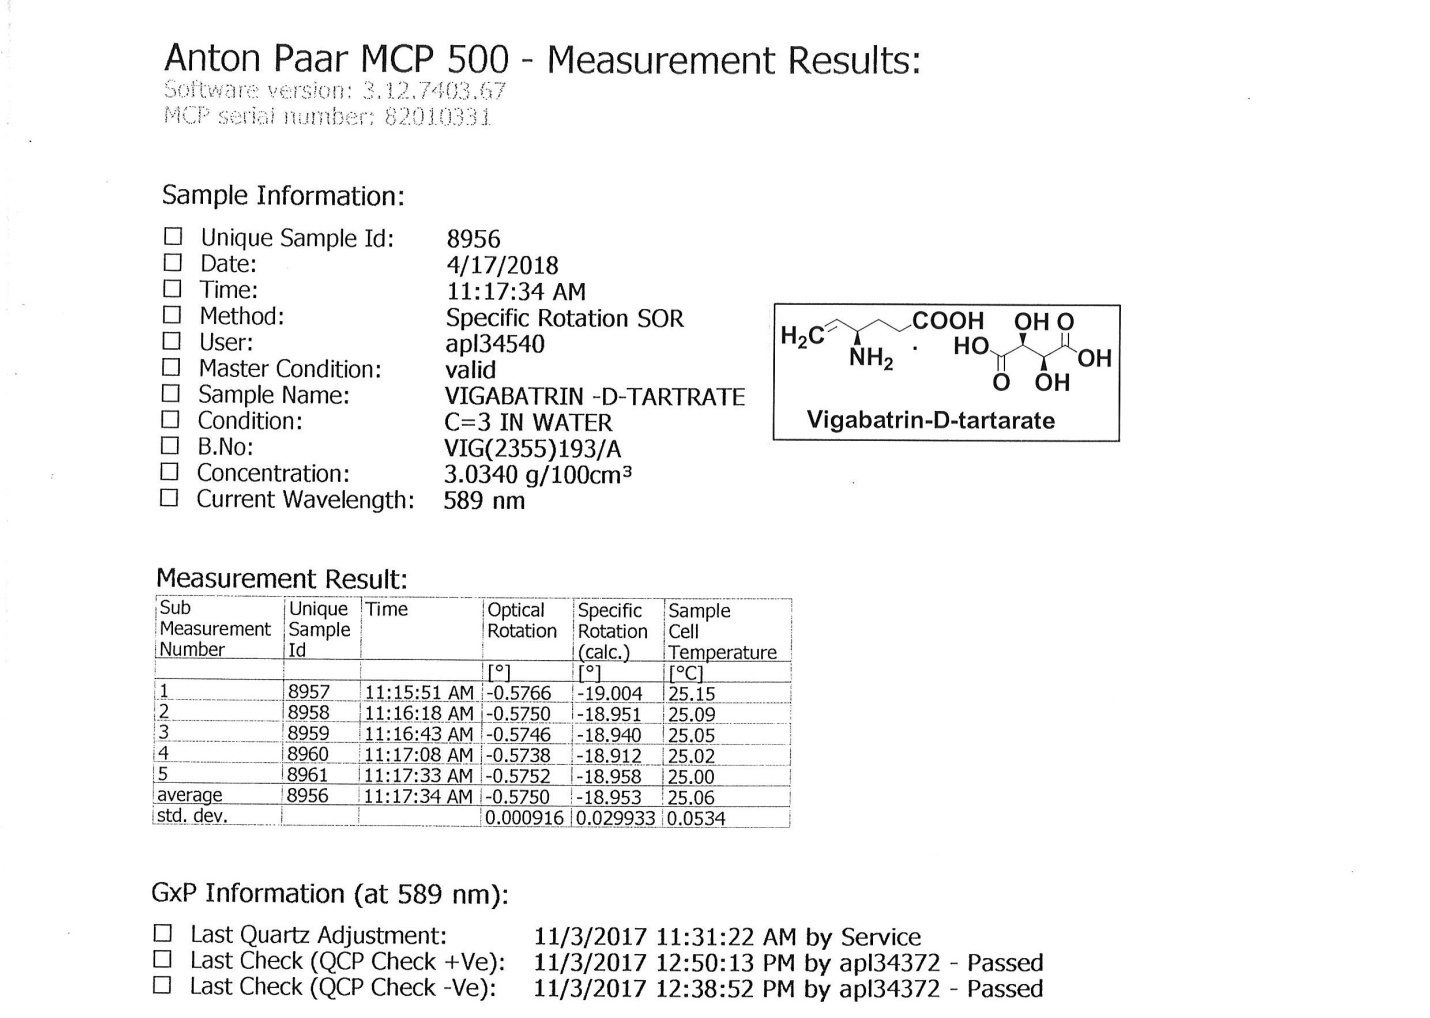


Specific Optical Rotation (SOR) of compound **7**


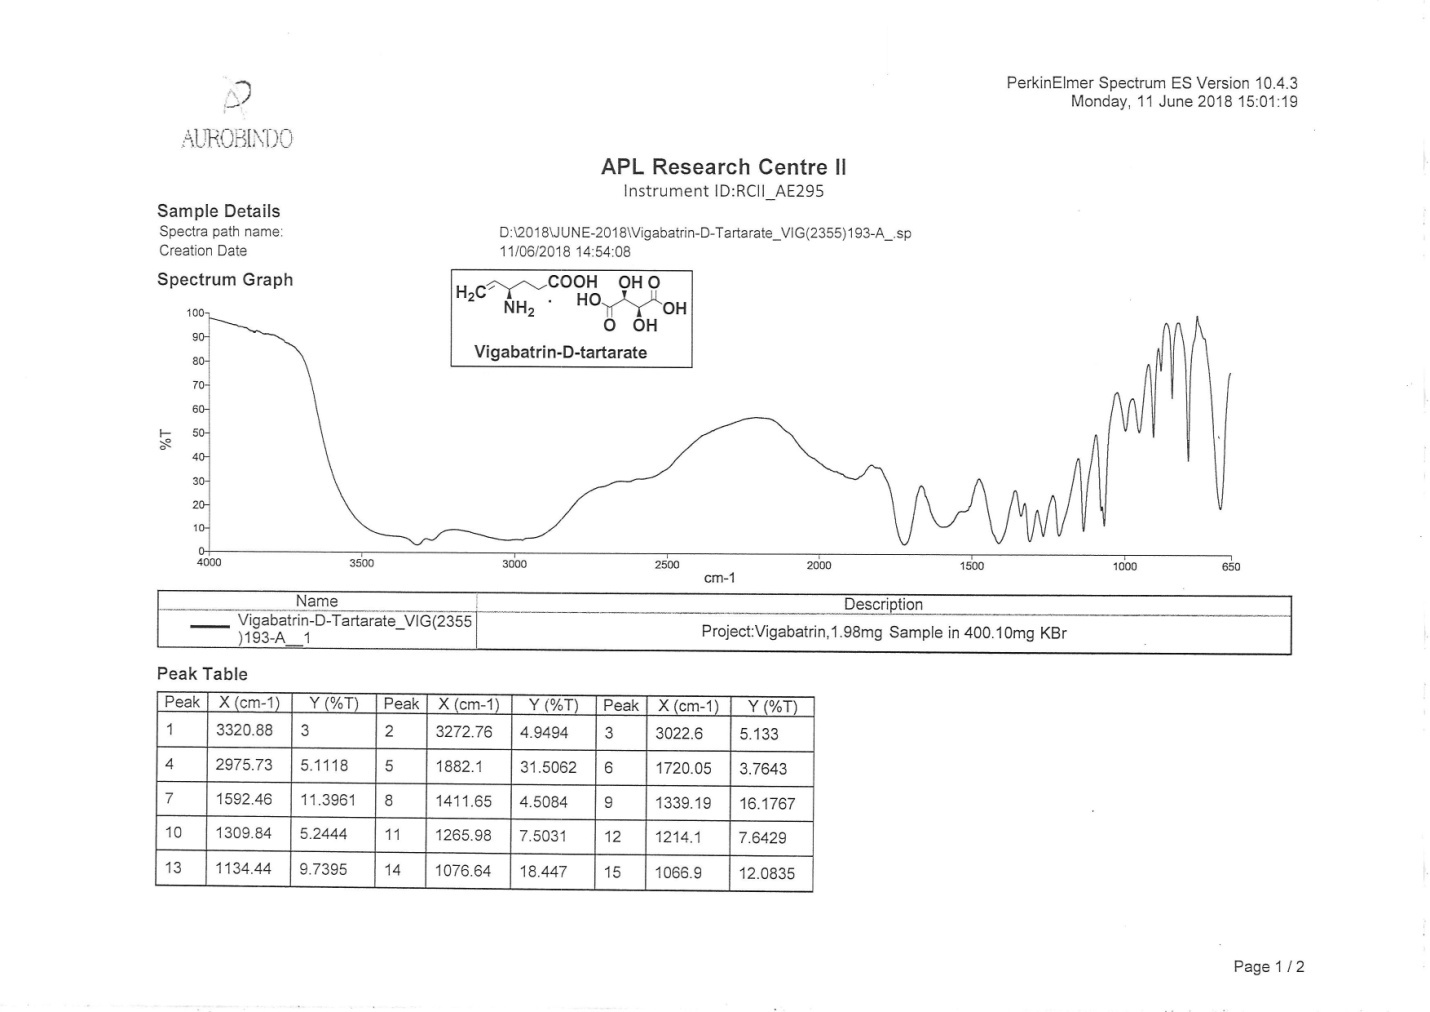


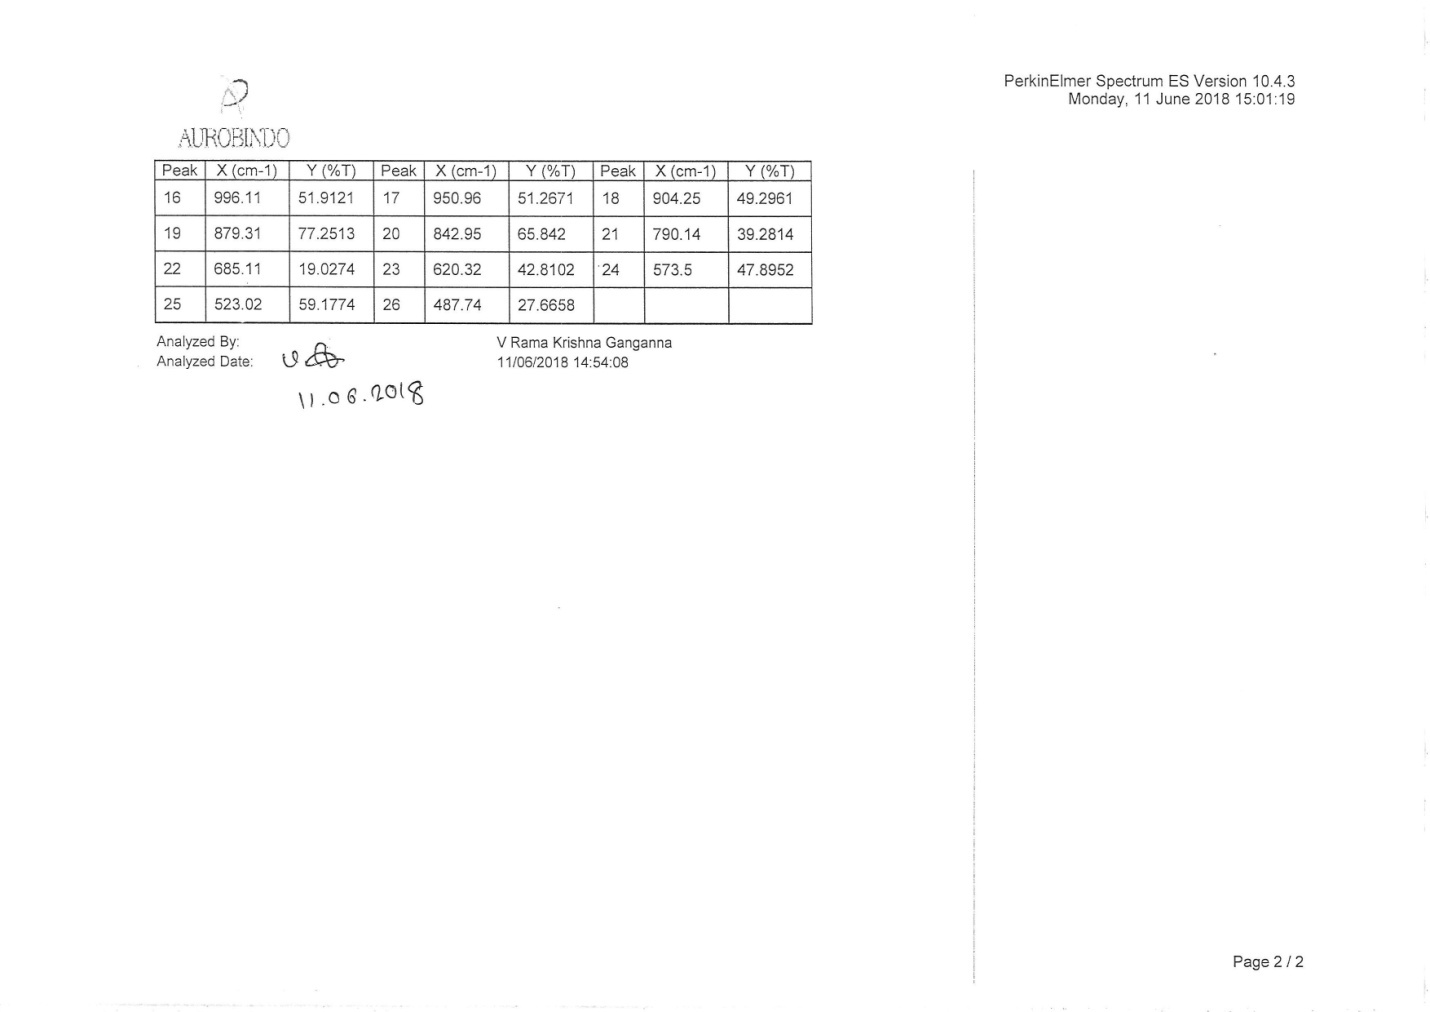


IR spectrum of compound **7**
